# Supplementary material for: Effects of Glutathione S-Transferases (GSTM1, GSTT1 and GSTP1) gene variants, alone and in combination with smoking or drinking, on cancers: a meta-analysis
Source: Research Square preprint supplement (doi:10.21203/rs.3.rs-1671597/v1), 2022-05-26
Supplement: Supplementary file 1 [file 1af5a1d4d7e7d8ba08f7d939.xlsx]

## Sheet: 总表2
Table 2. Characteristics of the Eligible Studies for GSTP1 Polymorphisms
No.	Author	Year	Ethnicity	Country	Cancer type	Source of control	Sample size of case	Sample size of control	Smoking		Non-smoking		Drinking		Non-drinking
									Ca: AA/AG+GG	Con: AA/AG+GG	Ca: AA/AG+GG	Con: AA/AG+GG	Ca: AA/AG+GG	Con: AA/AG+GG	Ca: AA/AG+GG	Con: AA/AG+GG	Genotyping Method
1	Deek	2021	Mixed	Egypt	Lung cancer	NA	200	200	66/69	59/40	29/36	73/28					TaqMan-SNP
2	Sciskalska	2021	Caucasian	USA	Acute pancreatitis	HB	39	15	11/13	12/16	4/11	9/14					PCR
3	Xiao	2021	Asian	China	Lung cancer	HB	974	1005	470/210	311/190	196/98	340/162					PCR
4	Katiyar	2020	Caucasian	India	Head and neck squamous cell carcinoma	HB	1250	1250	513/332	193/174	227/178	492/391	251/188	160/164	489/322	525/401	PCR
5	Kudhair	2020	Caucasian	Iraq	Lung cancer	NA	123	129	52/34	40/11	28/9	56/22					PCR-RELP
6	Yamashita	2019	Asian	Japan	Hypopharyngeal cancer	NA	61	71	22/8	11/2	23/9	44/14					PCR
7	Ritambhara	2019	Caucasian	India	Lung cancer	HB	120	100	72/40	10/16	4/4	44/30					PCR
8	Rostami	2019	Caucasian	Iran	Chronic myeloid leukemia	NA	104	104	30/27	12/19	24/23	26/47					PCR
9	Thekkepaurakkal	2019	Caucasian	Canada	Head and neck cancer	HB	389	429	164/156	143/168	39/28	51/66					PCR
10	Rodrigues-Fleming	2018	Caucasian	Brisal	Colorectal cancer	NA	232	738	57/45	91/115	50/80	136/177	48/52	111/145	59/73	116/147	PCR
11	Negovan	2017	Caucasian	Brasil	Premalignant Gastric Lesions	NA	101	169	3/8	7/5	58/32	78/79	14/13	18/22	47/27	67/62	PCR-RELP
12	Abo-Hashem	2016	Caucasian	Egypt	Hepatocellular carcinoma	NA	40	40	12/8	4/6	11/9	27/3					PCR-RELP
13	Ghosh	2016	Caucasian	India	Gastric cancer	NA	70	82	20/31	5/23	9/10	16/38	19/15	7/7	10/26	14/43	PCR-RELP
14	Silva	2014	Mixed	Brisal	Upper aerodigestive tract cancer	PB	116	224	59/39	16/39	50/24	49/52					PCR
15	Gu	2014	Asian	China	Lung cancer	PB	266	307	63/111	66/74	28/56	66/100					PCR
16	Yamada	2014	Asian	Japan	Pancreatic cancer	PB	360	400	49/47	30/28	74/71	99/103					PCR
17	Jiang	2014	Asian	China	Lung cancer	NA	322	456	19/131	42/177	28/144	51/186					PCR
18	Matic	2013	Caucasian	Serbia	Bladder cancer	HB	201	122	66/83	28/38	18/34	21/35					PCR
19	Pandith	2013	Caucasian	Kashmir	Bladder carcinogenesis	HB	180	210	39/105	21/135	10/26	14/40					PCR
20	Lv	2013	Asian	China	Lung cancer	HB	116	216	38/37	53/49	24/17	59/55					PCR
21	Berber	2013	Caucasian	Turkish	Prostate cancer	NA	115	115	32/33	25/29	26/24	37/24					PCR
22	García-González	2012	Caucasian	Spain	Gastric cancer	HB	557	557	72/50	39/36	126/119	160/138					PCR
23	Ramzy	2011	Caucasian	Egypt	Lung cancer	NA	48	42	7/24	7/7	2/15	21/2					PCR
24	Moaven	2010	Caucasian	Iran	Esophageal squamous cell carcinoma	HB	148	137	33/14	10/16	51/50	65/46					PCR
25	Li	2010	Mixed	South Africa	Oesophageal cancer	HB	245	288	71/106	77/108	21/42	30/65	63/102	74/93	29/46	33/80	PCR
26	Palma	2010	Caucasian	Italy	Cervical cancer	PB	81	111	13/15	17/15	15/19	20/25					PCR
27	Altayli	2009	Caucasian	Turkish	Bladder cancer	PB	135	128	59/35	29/34	11/24	20/27					PCR
28	Peters	2006	Caucasian	USA	Head and neck cancer	NA	692	753	304/246	254/209	83/57	161/124					PCR
29	Tamer	2005	Caucasian	Turkish	Gastric cancer	HB	70	204	18/16	41/43	20/16	49/71					PCR
30	Miller	2003	Caucasian	USA	Lung cancer	NA	1042	1161	91/109	92/108	39/61	42/58					PCR
31	Toruner	2001	Caucasian	Turkish	Bladder cancer	PB	121	121	45/35	45/22	18/13	27/11					PCR
Mixed ethnicity: Study groups with more than one race or not explicitly mentioned. Ca: Case group; Con: Control group; HB: Hospital-based group; PB: Population-based group; NA: Not avaliable
